# Supplementary material for: Full-dimensional quantum mechanics calculations for the spectroscopic characterization of the isomerization transition states of HOCO/DOCO systems
Source: Royal Society of Chemistry journal article supplement (doi:10.1039/c7cp07673h), 2018-01-01
Supplement: c7cp07673h1.pdf [file c7cp07673h1.pdf]

Supplementary Materials for  
Full-dimensional quantum mechanics calculations  
for the spectroscopic characterization of the  
isomerization transition states of HOCO/DOCO systems

*Dandan Ma<sup>1</sup>, Haisheng Ren<sup>2\*</sup> and Jianyi Ma<sup>1\*</sup>*

*<sup>1</sup>Institute of Atomic and Molecular Physics, Sichuan University, Chengdu, Sichuan 610065,  
China*

*<sup>2</sup>School of Chemical Engineering, Sichuan University, Chengdu, Sichuan 610065, China*

## Supplementary Materials

### Coordinates system

Diatom-diatom Jacobi coordinates were used, which include six coordinates,  $r_0$ ,  $r_1$ ,  $r_2$ ,  $\theta_1$ ,  $\theta_2$  and  $\phi$ , as depicted in Fig. S1. In detail,  $r_1$  and  $r_2$  refer to the diatomic bond lengths of HO and CO, respectively, while  $r_0$  represents the distance between the two centers of mass.  $\theta_1(\theta_2)$  is the Jacobi angular coordinate between vectors  $\vec{r}_0$  and  $\vec{r}_1(\vec{r}_2)$ , with the out-of-plane torsion angle is given by  $\phi$ .

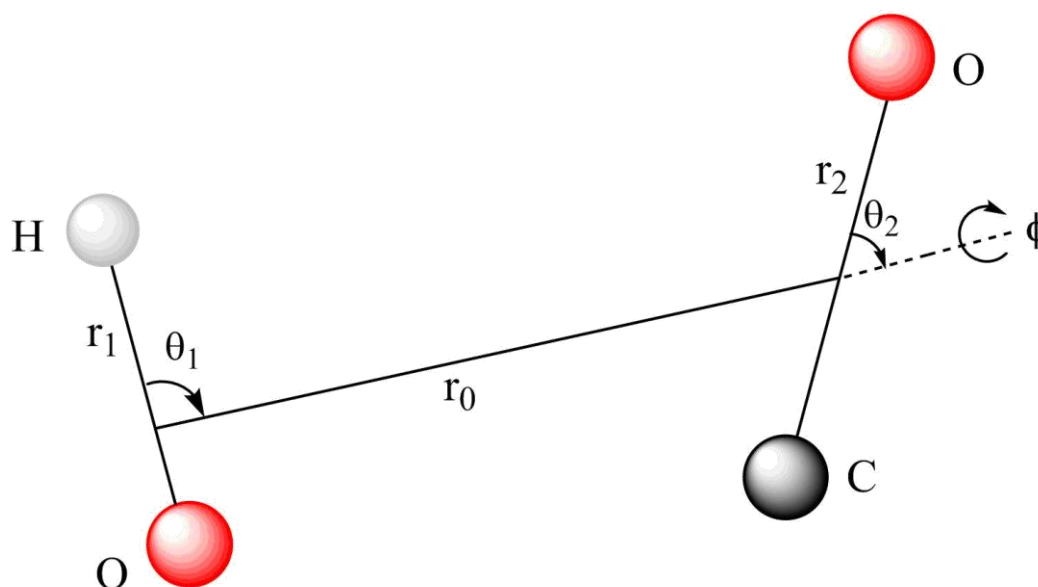

Figure S1. Jacobi coordinates used to describe the diatom-diatom HOCO system.

### Potential energy surface

The highly accurate full-dimensional global PES for HOCO (and its deuterated isotopomer DOCO) used in our work was developed by Li *et al.* using about 75000 *ab initio* points which were calculated using a definitely corrected couple cluster with singles, doubles, and perturbative triples with the augmented correlation-consistent polarized valence triple-zeta basis set (CCSD(T)-F12a/AVTZ).<sup>1, 2</sup> The permutation invariant polynomial neural network (PIP-NN) approach was employed to fit these points which were assigned in three regions, i.e., the OH + CO entrance channel region, the H + CO<sub>2</sub> exit channel region and the HOCO interaction region. The

PIP-NN method refers to adapting the permutation symmetry rigorously in the NN fitting. That is to say the low-order PIPs also were included in the input layer of the NNs. They are symmetrized monomials,<sup>3</sup>

$$G = \hat{S} \prod_{i < j}^N p_{ij}^{l_{ij}} \quad (1)$$

where  $\hat{S}$  is the symmetrization operator, containing all possible systemic nuclear permutation operations.  $p_{ij} = \exp(-ar_{ij})$  represent the Morse-like variables with  $a$  is an constant changeable and  $r_{ij}$  are the  $N(N-1)/2$  internuclear distances. Besides,  $l_{ij}$  is the degree of  $p_{ij}$  and

$$M = \sum_{i < j}^N l_{ij} \quad (2)$$

is the total degree in each monomial. In the input layer, the number of PIPs should be sufficiently large in order to ensure the permutation symmetry of the system<sup>4</sup>. In this fitting, all 17 PIPs up to the second order had been included.

Some of the NN structures in different region with one or two hidden layers were tested, especially the HOCO interaction region as the complex structure of PES. Two hidden layers with  $N_1$  and  $N_2$  neurons are settled. The *ab initio* data is divided into three sets in each NN fitting, i.e., the training, validation, and test set including 90%, 5%, and 5% of the data points respectively. The Levenberg Marquardt algorithm<sup>5</sup> was employed in all of the NN fittings, and the root mean square error (RMSE) was given by:

$$\text{RMSE} = \sqrt{\sum_{i=1}^{N_{\text{data}}} (E_{\text{fitted}} - E_{\text{ab}})^2 / N_{\text{data}}} \quad (3)$$

where  $E_{\text{fitted}}$  and  $E_{\text{ab}}$  are respectively the fitted energy and the *ab initio* energy. Fits with similar RMSEs for all three sets were selected to avoid false extrapolation. The maximum deviation also as evaluation criteria was used to select the final PIP-NN fits. Following the NN ensemble approach, the final PIP-NN PES was obtained by averaging the three best fits to minimize random errors.<sup>6</sup> At last, switch functions

were employed to connect the three regions.

Details for the finally fitting were listed. For the OH + CO region, 1021 parameters and a two-layer NN structure, (N1–N2) = (20–30), were used. Meanwhile, the final NN structure in H + CO<sub>2</sub> region has a single-layer, (N1–N2) = (10–0), with 761 parameters. For the important HOCO region, a two layers NN structure, (N1–N2) = (50–80), with 5061 parameters were employed in the final fitting. Thus the RMSE and the maximum deviation of the total PES are 5.0 meV and 209.4 meV, respectively. While, for points of energies less than 3.0 eV (relative to the global minimum), the corresponding values are separately 3.0 meV and 127.7 meV.

### Lanczos algorithm

Lanczos algorithm<sup>7</sup> was used to calculate the eigenvalues and wavefunctions of the HOCO system, where the related six-dimensional (6D) non-rotating ( $J=0$ ) Hamiltonian ( $\hbar=1$ ) on the basis of the above coordinate system is defined as follows,

$$\begin{aligned} \hat{H} = & \sum_{i=0}^1 \left( -\frac{1}{2\mu_i} \frac{\partial^2}{\partial r_i^2} \right) + \left( -\frac{1}{2\mu_2} \frac{\partial^2}{\partial r_2^2} + V_2(r_2) \right) \\ & + \sum_{i=0}^2 \frac{\hat{j}_i^2}{2\mu_i r_i^2} + \left[ V(r_0, r_1, r_2, \theta_1, \theta_2, \phi) - \sum_{i=0}^2 V_i(r_i) \right] \end{aligned} \quad (4)$$

where  $\mu_i$  are the reduced masses of the radial coordinates,  $V$  is the PES mentioned above, and  $V_i$  is the reference potential along the corresponding radial coordinates.  $\hat{j}_1, \hat{j}_2$  serve as the angular momentum operators corresponding to  $\theta_1, \theta_2$ . It is should be noted that  $\hat{j}_0^2 = (\hat{j}_1 + \hat{j}_2)^2$ . For the wavefunctions, the potential-optimized discrete variable representation (PODVR)<sup>8,9</sup> was used to describe the three radial coordinates, and the uncoupled spherical harmonics basis was adopted to describe the angular directions,

$$|j_1 m_1 j_2 m_2\rangle = |j_1 m_1\rangle |j_2 m_2\rangle = Y_{j_1 m_1}(\theta_1) Y_{j_2 m_2}(\theta_2) \Phi_{m_1}(\phi) \quad (5)$$

where  $Y$  are spherical harmonics functions,  $\Phi$  are Fourier functions, and  $m$  are the azimuthal quantum numbers.<sup>10</sup> The Lanczos states  $|\psi_k\rangle$  were derived from the

iteration of the normalized initial state of  $|\psi_1\rangle$  using the following three-term recursion formula,

$$|\psi_{k+1}\rangle = \beta_k^{-1} [\widehat{H}|\psi_k\rangle - \alpha_k|\psi_k\rangle - \beta_{k-1}|\psi_{k-1}\rangle], \quad k=1, 2 \dots \quad (6)$$

where  $\widehat{H}$  is the Hamiltonian and  $\alpha_k$  and  $\beta_k$  represent the diagonal and sub/super-diagonal elements of the tridiagonal Lanczos matrix, respectively, given by

$$\begin{aligned} \alpha_k &= \langle \psi_k | \widehat{H} \psi_k - \beta_{k-1} \psi_{k-1} \rangle \\ \beta_k &= \langle \widehat{H} \psi_k - \alpha_k \psi_k - \beta_{k-1} \psi_{k-1} | \widehat{H} \psi_k - \alpha_k \psi_k - \beta_{k-1} \psi_{k-1} \rangle^{\frac{1}{2}} \\ \beta_0 &= 0 \end{aligned} \quad (7)$$

By diagonalizing the  $K \times K$  Lanczos matrix, we can obtain the eigenvectors  $\{Z_i^{(k)} = [z_{li}^{(k)}, \dots, z_{ki}^{(k)}, \dots, z_{Ki}^{(k)}]^T\}$  as well as the corresponding eigenvalues  $\{E_i^{(k)}\}$  of the given iteration step  $K$ . Subsequently, the wavefunctions can be expressed as a linear combination of eigenvectors and iterative Lanczos states, namely,  $|E_i^{(k)}\rangle = \sum_{K=1}^K z_{ki}^{(K)} |\psi_k\rangle$ . Hence, the smallness of the last element of the Lanczos eigenvector, i.e.,  $|z_{Ki}^{(K)}|$ , becomes the decisive factor for the convergence of the Lanczos iteration.

We listed pure torsional states of *trans*-HOCO, *cis*-HOCO, *trans*-DOCO and *cis*-DOCO which were used in the calculation and fit of effective frequencies in Table S5. It should be noted that all of the levels belong to a species were used in the fitted curves 1, except the level of *trans*-HOCO marked in red. In the fitted curves 2, the levels marked in blue were not included.

Table S1. Parameters in the calculations of the HOCO (DOCO) system

| Parameters                  | HOCO                                                                                                                          | DOCO                                                                                                                          |
|-----------------------------|-------------------------------------------------------------------------------------------------------------------------------|-------------------------------------------------------------------------------------------------------------------------------|
| Grid/basis ranges and sizes | $r_0 \in (1.5, 7.5), N_0 = 10$<br>$r_1 \in (1.1, 4.5), N_1 = 4$<br>$r_2 \in (1.2, 5.0), N_2 = 6$<br>PODVR for $r_0, r_1, r_2$ | $r_0 \in (1.5, 7.5), N_0 = 10$<br>$r_1 \in (1.1, 4.5), N_1 = 5$<br>$r_2 \in (1.2, 5.0), N_2 = 5$<br>PODVR for $r_0, r_1, r_2$ |
| Largest values of $j_1$     | 55                                                                                                                            | 55                                                                                                                            |
| Largest values of $j_2$     | 80                                                                                                                            | 80                                                                                                                            |
| Largest values of m         | 55                                                                                                                            | 55                                                                                                                            |
| Lanczos steps               | 25000                                                                                                                         | 25000                                                                                                                         |

Table S2. Fundamental vibrational frequencies (in  $\text{cm}^{-1}$ ) for both *trans*- and *cis*-DOCO

| mode                   | <i>trans</i> -DOCO |                    |                    |                                                                | <i>cis</i> -DOCO |                    |                    |                                       |
|------------------------|--------------------|--------------------|--------------------|----------------------------------------------------------------|------------------|--------------------|--------------------|---------------------------------------|
|                        | This work          | Theo. <sup>a</sup> | Theo. <sup>b</sup> | Exp. <sup>m</sup>                                              | This work        | Theo. <sup>a</sup> | Theo. <sup>b</sup> | Exp. <sup>m</sup>                     |
| $\nu_1$ , O-D stretch  | 2684.60            | 2691               | 2685.1             | 2558 <sup>e</sup> , 2684.10 <sup>k</sup> , 2678.1 <sup>g</sup> | 2544.71          | 2558               | 2551.6             | 2456 <sup>e</sup> ,                   |
| $\nu_2$ , C-O' stretch | 1850.19            | 1859               | 1859.8             | 1825 <sup>e</sup> , 1851.65 <sup>h</sup> , 1846.2 <sup>g</sup> | 1818.17          | 1829               | 1827.5             | 1798 <sup>e</sup> ,                   |
| $\nu_3$ , D-O-C bend   | 1080.27            | 1092               | 1086.4             | 1117 <sup>e</sup> , 1145 <sup>i</sup> , 1082.6 <sup>g</sup>    | 1118.81          | 1132               | 1123.1             | 1148 <sup>e</sup> , 1081 <sup>i</sup> |
| $\nu_4$ , O-C stretch  | 898.09             | 906                | 902.6              | ...                                                            | 956.19           | 961                | 960.9              | ...                                   |
| $\nu_5$ , O-C-O' bend  | 586.98             | 593                | 590.1              | 557 <sup>i</sup>                                               | 535.79           | 539                | 539.8              | 563 <sup>e</sup> , 597 <sup>i</sup>   |
| $\nu_6$ , torsion      | 392.77             | 396                | 368.0              | 472 <sup>e</sup>                                               | 456.55           | 452                | 446.9              | 497 <sup>e</sup>                      |

<sup>a</sup> Reference 11, <sup>b</sup> Reference 12, <sup>c</sup> Reference 13, <sup>g</sup> Reference 14, <sup>h</sup> Reference 15,

<sup>i</sup> Reference 16, <sup>k</sup> Reference 17

Table S3. Energy and assignments of vibrational levels of *trans*-HOCO and *cis*-HOCO up to 3500 cm<sup>-1</sup>

| NO. | <i>trans</i> -HOCO |                                 |         |                                                | <i>cis</i> -HOCO |                                                             |         |                                              |         |                                                             |
|-----|--------------------|---------------------------------|---------|------------------------------------------------|------------------|-------------------------------------------------------------|---------|----------------------------------------------|---------|-------------------------------------------------------------|
|     | Energy             | states                          | Energy  | states                                         | Energy           | states                                                      | Energy  | states                                       | Energy  | states                                                      |
| 1   | 0                  | 6 <sup>0</sup>                  | 2453.54 | 6 <sup>0</sup> 5 <sup>4</sup>                  | 3066.07          | 6 <sup>0</sup> 5 <sup>2</sup> 2 <sup>1</sup>                | 527.24  | 6 <sup>0</sup>                               | 2991.88 | 6 <sup>0</sup> 5 <sup>2</sup> 3 <sup>1</sup>                |
| 2   | 502.78             | 6 <sup>1</sup>                  | 2458.27 | 6 <sup>0</sup> 5 <sup>1</sup> 2 <sup>1</sup>   | 3070.01          | 6 <sup>0</sup> 5 <sup>5</sup>                               | 1074.84 | 6 <sup>1</sup>                               | 3056.16 | 6 <sup>3</sup> 4 <sup>1</sup>                               |
| 3   | 611.84             | 6 <sup>0</sup> 5 <sup>1</sup>   | 2467.72 | 6 <sup>3</sup> 4 <sup>1</sup>                  | 3078.89          | 6 <sup>3</sup> 5 <sup>1</sup> 4 <sup>1</sup>                | 1122.16 | 6 <sup>0</sup> 5 <sup>1</sup>                | 3058.74 | 6 <sup>0</sup> 3 <sup>2</sup>                               |
| 4   | 982.22             | 6 <sup>2</sup>                  | 2485.77 | 6 <sup>4</sup> 5 <sup>1</sup>                  | 3088.13          | 6 <sup>0</sup> 4 <sup>3</sup>                               | 1565.16 | 6 <sup>0</sup> 4 <sup>1</sup>                | 3124.97 | 6 <sup>1</sup> 4 <sup>2</sup>                               |
| 5   | 1048.04            | 6 <sup>0</sup> 4 <sup>1</sup>   | 2570.28 | 6 <sup>1</sup> 4 <sup>2</sup>                  | 3108.12          | 6 <sup>4</sup> 5 <sup>2</sup>                               | 1582.87 | 6 <sup>2</sup>                               | 3171.93 | 6 <sup>0</sup> 4 <sup>2</sup> 5 <sup>1</sup>                |
| 6   | 1118.56            | 6 <sup>1</sup> 5 <sup>1</sup>   | 2595.0  | 6 <sup>6</sup>                                 | 3168.04          | 6 <sup>1</sup> 5 <sup>1</sup> 4 <sup>2</sup>                | 1669.69 | 6 <sup>1</sup> 5 <sup>1</sup>                | 3189.62 | 6 <sup>2</sup> 5 <sup>1</sup> 4 <sup>1</sup>                |
| 7   | 1436.80            | 6 <sup>3</sup>                  | 2626.20 | 6 <sup>3</sup> 3 <sup>1</sup>                  | 3206.28          | 6 <sup>2</sup> 4 <sup>1</sup> 3 <sup>1</sup>                | 1719.63 | 6 <sup>0</sup> 5 <sup>2</sup>                | 3272.77 | 6 <sup>3</sup> 3 <sup>1</sup>                               |
| 8   | 1204.33            | 6 <sup>0</sup> 3 <sup>1</sup>   | 2671.28 | 6 <sup>0</sup> 5 <sup>1</sup> 4 <sup>2</sup>   | 3221.61          | 6 <sup>6</sup> 5 <sup>1</sup>                               | 1799.65 | 6 <sup>0</sup> 3 <sup>1</sup>                | 3322.83 | 6 <sup>9</sup>                                              |
| 9   | 1224.99            | 6 <sup>0</sup> 5 <sup>2</sup>   | 2627.81 | 6 <sup>2</sup> 5 <sup>1</sup> 4 <sup>1</sup>   | 3234.91          | 6 <sup>2</sup> 5 <sup>2</sup> 4 <sup>1</sup>                | 2042.61 | 6 <sup>3</sup>                               | 3348.90 | 6 <sup>0</sup> 5 <sup>3</sup> 4 <sup>1</sup>                |
| 10  | 1546.59            | 6 <sup>1</sup> 4 <sup>1</sup>   | 2679.23 | 6 <sup>3</sup> 5 <sup>2</sup>                  | 3246.47          | 6 <sup>3</sup> 5 <sup>1</sup> 3 <sup>1</sup>                | 2109.13 | 6 <sup>1</sup> 4 <sup>1</sup>                | 3362.14 | 6 <sup>2</sup> 5 <sup>3</sup>                               |
| 11  | 1600.83            | 6 <sup>2</sup> 5 <sup>1</sup>   | 2739.20 | 6 <sup>1</sup> 4 <sup>1</sup> 3 <sup>1</sup>   | 3259.42          | 6 <sup>0</sup> 4 <sup>2</sup> 3 <sup>1</sup>                | 2155.02 | 6 <sup>0</sup> 5 <sup>1</sup> 4 <sup>1</sup> | 3363.51 | 6 <sup>0</sup> 4 <sup>1</sup> 2 <sup>1</sup>                |
| 12  | 1651.56            | 6 <sup>0</sup> 5 <sup>1</sup> 4 | 2761.61 | 6 <sup>1</sup> 5 <sup>2</sup> 4 <sup>1</sup>   | 3271.11          | 6 <sup>0</sup> 5 <sup>2</sup> 4 <sup>2</sup>                | 2172.93 | 6 <sup>2</sup> 5 <sup>1</sup>                | 3365.73 | 6 <sup>1</sup> 4 <sup>1</sup> 3 <sup>1</sup>                |
| 13  | 1705.08            | 6 <sup>1</sup> 3 <sup>1</sup>   | 2790.96 | 6 <sup>7</sup>                                 | 3288.04          | 6 <sup>5</sup> 4 <sup>1</sup>                               | 2267.14 | 6 <sup>1</sup> 5 <sup>2</sup>                | 3389.26 | 6 <sup>2</sup> 2 <sup>1</sup>                               |
| 14  | 1734.90            | 6 <sup>1</sup> 5 <sup>2</sup>   | 2795.58 | 6 <sup>2</sup> 5 <sup>1</sup> 3 <sup>1</sup>   | 3299.402         | 6 <sup>3</sup> 5 <sup>3</sup>                               | 2320.30 | 6 <sup>0</sup> 5 <sup>3</sup>                | 3407.22 | 6 <sup>0</sup> 5 <sup>1</sup> 4 <sup>1</sup> 3 <sup>1</sup> |
| 15  | 1812.21            | 6 <sup>0</sup> 5 <sup>1</sup> 3 | 2826.38 | 6 <sup>2</sup> 5 <sup>3</sup>                  | 3343.27          | 6 <sup>1</sup> 5 <sup>1</sup> 4 <sup>1</sup> 3 <sup>1</sup> | 2341.89 | 6 <sup>0</sup> 2 <sup>1</sup>                | 3429.75 | 6 <sup>2</sup> 5 <sup>1</sup> 3 <sup>1</sup>                |
| 16  | 1838.86            | 6 <sup>0</sup> 5 <sup>3</sup>   | 2834.85 | 6 <sup>2</sup> 2 <sup>1</sup>                  | 3353.04          | 6 <sup>2</sup> 3 <sup>2</sup>                               | 2348.86 | 6 <sup>1</sup> 3 <sup>1</sup>                | 3463.67 | 6 <sup>4</sup> 4 <sup>1</sup>                               |
| 17  | 1852.12            | 6 <sup>0</sup> 2 <sup>1</sup>   | 2842.58 | 6 <sup>0</sup> 5 <sup>1</sup> 4 <sup>1</sup> 3 | 3370.46          | 6 <sup>1</sup> 5 <sup>3</sup> 4 <sup>1</sup>                | 2394.31 | 6 <sup>0</sup> 5 <sup>1</sup> 3 <sup>1</sup> | 3472.80 | 6 <sup>1</sup> 5 <sup>4</sup>                               |
| 18  | 1861.93            | 6 <sup>4</sup>                  | 2864.92 | 6 <sup>0</sup> 5 <sup>3</sup> 4 <sup>1</sup>   | 3372.36          | 6 <sup>1</sup> 4 <sup>1</sup> 2 <sup>1</sup>                | 2459.03 | 6 <sup>4</sup>                               | 3475.57 | 6 <sup>1</sup> 5 <sup>1</sup> 2 <sup>1</sup>                |
| 19  | 2019.34            | 6 <sup>2</sup> 4 <sup>1</sup>   | 2876.06 | 6 <sup>5</sup> 5 <sup>1</sup>                  | 3412.36          | 6 <sup>5</sup> 3 <sup>1</sup>                               | 2587.99 | 6 <sup>0</sup> 4 <sup>2</sup>                |         |                                                             |
| 20  | 2058.38            | 6 <sup>3</sup> 5 <sup>1</sup>   | 2878.27 | 6 <sup>0</sup> 4 <sup>1</sup> 2 <sup>1</sup>   | 3416.53          | 6 <sup>0</sup> 3 <sup>2</sup> 4 <sup>1</sup>                | 2608.37 | 6 <sup>2</sup> 4 <sup>1</sup>                |         |                                                             |
| 21  | 2076.38            | 6 <sup>0</sup> 4 <sup>2</sup>   | 2885.88 | 6 <sup>1</sup> 3 <sup>2</sup>                  | 3437.97          | 6 <sup>2</sup> 5 <sup>2</sup> 3 <sup>1</sup>                | 2696.14 | 6 <sup>1</sup> 5 <sup>1</sup> 4 <sup>1</sup> |         |                                                             |
| 22  | 2153.67            | 6 <sup>1</sup> 5 <sup>1</sup> 4 | 2886.19 | 6 <sup>4</sup> 4 <sup>1</sup>                  | 3442.36          | 6 <sup>0</sup> 5 <sup>2</sup> 4 <sup>1</sup> 3 <sup>1</sup> | 2748.58 | 6 <sup>0</sup> 5 <sup>2</sup> 4 <sup>1</sup> |         |                                                             |
| 23  | 2179.10            | 6 <sup>2</sup> 3 <sup>1</sup>   | 2931.54 | 6 <sup>1</sup> 5 <sup>2</sup> 3 <sup>1</sup>   | 3453.63          | 6 <sup>2</sup> 5 <sup>4</sup>                               | 2765.65 | 6 <sup>2</sup> 5 <sup>2</sup>                |         |                                                             |
| 24  | 2218.82            | 6 <sup>2</sup> 5 <sup>2</sup>   | 2966.79 | 6 <sup>8</sup>                                 | 3475.23          | 6 <sup>0</sup> 5 <sup>4</sup> 4 <sup>1</sup>                | 2817.43 | 6 <sup>0</sup> 4 <sup>1</sup> 3 <sup>1</sup> |         |                                                             |
| 25  | 2241.77            | 6 <sup>0</sup> 4 <sup>1</sup> 3 | 2969.55 | 6 <sup>1</sup> 5 <sup>4</sup>                  | 3476.43          | 6 <sup>0</sup> 5 <sup>1</sup> 4 <sup>1</sup> 2 <sup>1</sup> | 2843.94 | 6 <sup>2</sup> 3 <sup>1</sup>                |         |                                                             |
| 26  | 2251.07            | 6 <sup>5</sup>                  | 2994.00 | 6 <sup>0</sup> 5 <sup>1</sup> 3 <sup>2</sup>   | 3478.56          | 6 <sup>3</sup> 4 <sup>2</sup>                               | 2867.56 | 6 <sup>1</sup> 5 <sup>3</sup>                |         |                                                             |
| 27  | 2257.44            | 6 <sup>0</sup> 5 <sup>2</sup> 4 | 3031.32 | 6 <sup>0</sup> 5 <sup>3</sup> 3 <sup>1</sup>   | 3497.60          | 6 <sup>1</sup> 5 <sup>1</sup> 3 <sup>2</sup>                | 2887.98 | 6 <sup>1</sup> 2 <sup>1</sup>                |         |                                                             |
| 28  | 2318.15            | 6 <sup>1</sup> 5 <sup>1</sup> 3 | 3035.78 | 6 <sup>2</sup> 4 <sup>2</sup>                  | 3498.70          | 6 <sup>4</sup> 5 <sup>1</sup> 4 <sup>1</sup>                | 2924.92 | 6 <sup>0</sup> 5 <sup>4</sup>                |         |                                                             |
| 29  | 2352.30            | 6 <sup>1</sup> 5 <sup>3</sup>   | 3040.52 | 6 <sup>4</sup> 3 <sup>1</sup>                  | 3497.60          | 6 <sup>1</sup> 5 <sup>1</sup> 3 <sup>2</sup>                | 2929.81 | 6 <sup>0</sup> 5 <sup>1</sup> 2 <sup>1</sup> |         |                                                             |
| 30  | 2387.78            | 6 <sup>0</sup> 3 <sup>2</sup>   | 3050.07 | 6 <sup>0</sup> 3 <sup>1</sup> 2 <sup>1</sup>   | 3498.70          | 6 <sup>4</sup> 5 <sup>1</sup> 4 <sup>1</sup>                | 2942.67 | 6 <sup>1</sup> 5 <sup>1</sup> 3 <sup>1</sup> |         |                                                             |
| 31  | 2421.02            | 6 <sup>0</sup> 5 <sup>2</sup> 3 |         |                                                |                  |                                                             | 2966.79 |                                              |         |                                                             |

Table S4. Energy and assignments of vibrational levels of *trans*-DOCOC and *cis*-DOCOC up to 3500 cm<sup>-1</sup>

| NO. | <i>trans</i> -DOCOC |                                              |         |                                                             | <i>cis</i> -DOCOC |                                                             |         |                                              |         |                                                             |
|-----|---------------------|----------------------------------------------|---------|-------------------------------------------------------------|-------------------|-------------------------------------------------------------|---------|----------------------------------------------|---------|-------------------------------------------------------------|
|     | Energy              | states                                       | Energy  | states                                                      | Energy            | states                                                      | Energy  | states                                       | Energy  | states                                                      |
| 1   | 0                   | 6 <sup>0</sup>                               | 2454.11 | 6 <sup>5</sup> 5 <sup>1</sup>                               | 3071.51           | 6 <sup>1</sup> 1 <sup>1</sup>                               | 564.42  | 6 <sup>0</sup>                               | 3109.13 | 6 <sup>0</sup> 1 <sup>1</sup>                               |
| 2   | 392.77              | 6 <sup>1</sup>                               | 2469.37 | 6 <sup>1</sup> 5 <sup>2</sup> 4 <sup>1</sup>                | 3080.35           | 6 <sup>3</sup> 4 <sup>1</sup> 3 <sup>1</sup>                | 1020.97 | 6 <sup>1</sup>                               | 3138.70 | 6 <sup>0</sup> 5 <sup>3</sup> 4 <sup>1</sup>                |
| 3   | 587.04              | 6 <sup>0</sup> 5 <sup>1</sup>                | 2519.53 | 6 <sup>1</sup> 3 <sup>2</sup>                               | 3082.61           | 6 <sup>7</sup> 5 <sup>1</sup>                               | 1100.21 | 6 <sup>0</sup> 5 <sup>1</sup>                | 3164.11 | 6 <sup>0</sup> 5 <sup>1</sup> 4 <sup>1</sup> 3 <sup>1</sup> |
| 4   | 773.69              | 6 <sup>2</sup>                               | 2542.62 | 6 <sup>0</sup> 5 <sup>1</sup> 4 <sup>1</sup> 3 <sup>1</sup> | 3090.31           | 6 <sup>10</sup>                                             | 1451.47 | 6 <sup>2</sup>                               | 3175.79 | 6 <sup>4</sup> 4 <sup>1</sup>                               |
| 5   | 898.09              | 6 <sup>0</sup> 4 <sup>1</sup>                | 2546.33 | 6 <sup>4</sup> 3 <sup>1</sup>                               | 3096.05           | 6 <sup>1</sup> 5 <sup>1</sup> 3 <sup>2</sup>                | 1520.62 | 6 <sup>0</sup> 4 <sup>1</sup>                | 3179.05 | 6 <sup>1</sup> 5 <sup>4</sup>                               |
| 6   | 985.65              | 6 <sup>1</sup> 5 <sup>1</sup>                | 2550.57 | 6 <sup>2</sup> 4 <sup>2</sup>                               | 3118.06           | 6 <sup>0</sup> 5 <sup>2</sup> 4 <sup>1</sup> 3 <sup>1</sup> | 1554.12 | 6 <sup>1</sup> 5 <sup>1</sup>                | 3205.82 | 6 <sup>1</sup> 5 <sup>2</sup> 3 <sup>1</sup>                |
| 7   | 1080.26             | 6 <sup>0</sup> 3 <sup>1</sup>                | 2567.97 | 6 <sup>2</sup> 5 <sup>3</sup>                               | 3131.65           | 6 <sup>1</sup> 4 <sup>1</sup> 2 <sup>1</sup>                | 1641.77 | 6 <sup>0</sup> 5 <sup>2</sup>                | 3226.94 | 6 <sup>1</sup> 3 <sup>2</sup>                               |
| 8   | 1141.24             | 6 <sup>3</sup>                               | 2619.81 | 6 <sup>2</sup> 2 <sup>1</sup>                               | 3145.39           | 6 <sup>4</sup> 5 <sup>1</sup> 3 <sup>1</sup>                | 1683.23 | 6 <sup>0</sup> 3 <sup>1</sup>                | 3246.78 | 6 <sup>4</sup> 5 <sup>2</sup>                               |
| 9   | 1173.94             | 6 <sup>0</sup> 5 <sup>2</sup>                | 2631.44 | 6 <sup>3</sup> 5 <sup>1</sup> 4 <sup>1</sup>                | 3165.90           | 6 <sup>2</sup> 5 <sup>4</sup>                               | 1861.36 | 6 <sup>3</sup>                               | 3265.51 | 6 <sup>2</sup> 2 <sup>1</sup>                               |
| 10  | 1288.65             | 6 <sup>1</sup> 4 <sup>1</sup>                | 2636.52 | 6 <sup>1</sup> 5 <sup>2</sup> 3 <sup>1</sup>                | 3175.99           | 6 <sup>0</sup> 3 <sup>3</sup>                               | 1974.39 | 6 <sup>1</sup> 4 <sup>1</sup>                | 3276.18 | 6 <sup>0</sup> 5 <sup>5</sup>                               |
| 11  | 1371.89             | 6 <sup>2</sup> 5 <sup>1</sup>                | 2650.19 | 6 <sup>0</sup> 5 <sup>3</sup> 4 <sup>1</sup>                | 3185.30           | 6 <sup>6</sup> 3 <sup>1</sup>                               | 1978.78 | 6 <sup>2</sup> 5 <sup>1</sup>                | 3303.97 | 6 <sup>3</sup> 5 <sup>1</sup> 4 <sup>1</sup>                |
| 12  | 1467.27             | 6 <sup>1</sup> 3 <sup>1</sup>                | 2664.96 | 6 <sup>0</sup> 4 <sup>3</sup>                               | 3212.73           | 6 <sup>2</sup> 5 <sup>1</sup> 2 <sup>1</sup>                | 2053.63 | 6 <sup>0</sup> 5 <sup>1</sup> 4 <sup>1</sup> | 3307.14 | 6 <sup>0</sup> 5 <sup>3</sup> 3 <sup>1</sup>                |
| 13  | 1482.31             | 6 <sup>0</sup> 5 <sup>1</sup> 4 <sup>1</sup> | 2684.60 | 6 <sup>0</sup> 1 <sup>1</sup>                               | 3220.80           | 6 <sup>1</sup> 5 <sup>3</sup> 3 <sup>1</sup>                | 2092.40 | 6 <sup>1</sup> 5 <sup>2</sup>                | 3325.54 | 6 <sup>2</sup> 4 <sup>2</sup>                               |
| 14  | 1493.73             | 6 <sup>4</sup>                               | 2686.60 | 6 <sup>8</sup>                                              | 3225.59           | 6 <sup>1</sup> 4 <sup>2</sup> 3 <sup>1</sup>                | 2132.37 | 6 <sup>1</sup> 3 <sup>1</sup>                | 3327.75 | 6 <sup>0</sup> 5 <sup>1</sup> 3 <sup>2</sup>                |
| 15  | 1578.46             | 6 <sup>1</sup> 5 <sup>2</sup>                | 2706.47 | 6 <sup>4</sup> 5 <sup>2</sup>                               | 3232.17           | 6 <sup>3</sup> 5 <sup>2</sup> 4 <sup>1</sup>                | 2189.86 | 6 <sup>0</sup> 5 <sup>3</sup>                | 3347.59 | 6 <sup>9</sup>                                              |
| 16  | 1659.24             | 6 <sup>0</sup> 5 <sup>1</sup> 3 <sup>1</sup> | 2708.77 | 6 <sup>5</sup> 4 <sup>1</sup>                               | 3234.21           | 6 <sup>0</sup> 5 <sup>4</sup> 4 <sup>1</sup>                | 2215.13 | 6 <sup>0</sup> 5 <sup>1</sup> 3 <sup>1</sup> | 3397.53 | 6 <sup>0</sup> 4 <sup>3</sup>                               |
| 17  | 1666.67             | 6 <sup>2</sup> 4 <sup>1</sup>                | 2709.27 | 6 <sup>0</sup> 5 <sup>1</sup> 3 <sup>2</sup>                | 3241.55           | 6 <sup>3</sup> 3 <sup>2</sup>                               | 2248.34 | 6 <sup>4</sup>                               | 3427.06 | 6 <sup>3</sup> 5 <sup>3</sup>                               |
| 18  | 1744.14             | 6 <sup>3</sup> 5 <sup>1</sup>                | 2723.18 | 6 <sup>2</sup> 4 <sup>1</sup> 3 <sup>1</sup>                | 3243.17           | 6 <sup>0</sup> 5 <sup>1</sup> 4 <sup>3</sup>                | 2375.18 | 6 <sup>3</sup> 5 <sup>1</sup>                | 3436.41 | 6 <sup>1</sup> 5 <sup>1</sup> 4 <sup>2</sup>                |
| 19  | 1760.67             | 6 <sup>0</sup> 5 <sup>3</sup>                | 2743.15 | 6 <sup>0</sup> 4 <sup>1</sup> 2 <sup>1</sup>                | 3253.52           | 6 <sup>4</sup> 4 <sup>2</sup>                               | 2382.59 | 6 <sup>0</sup> 2 <sup>1</sup>                | 3441.68 | 6 <sup>2</sup> 5 <sup>2</sup> 4 <sup>1</sup>                |
| 20  | 1786.19             | 6 <sup>0</sup> 4 <sup>2</sup>                | 2762.00 | 6 <sup>1</sup> 5 <sup>1</sup> 4 <sup>2</sup>                | 3268.58           | 6 <sup>0</sup> 5 <sup>1</sup> 1 <sup>1</sup>                | 2395.49 | 6 <sup>2</sup> 4 <sup>1</sup>                | 3455.58 | 6 <sup>0</sup> 5 <sup>2</sup> 2 <sup>1</sup>                |
| 21  | 1829.21             | 6 <sup>5</sup>                               | 2763.98 | 6 <sup>1</sup> 5 <sup>4</sup>                               | 3280.14           | 6 <sup>0</sup> 5 <sup>2</sup> 3 <sup>2</sup>                | 2464.76 | 6 <sup>0</sup> 4 <sup>2</sup>                | 3458.51 | 6 <sup>3</sup> 5 <sup>1</sup> 3 <sup>1</sup>                |
| 22  | 1841.82             | 6 <sup>2</sup> 3 <sup>1</sup>                | 2771.21 | 6 <sup>6</sup> 5 <sup>1</sup>                               | 3291.77           | 6 <sup>7</sup> 4 <sup>1</sup>                               | 2502.27 | 6 <sup>1</sup> 5 <sup>1</sup> 4 <sup>1</sup> | 3485.20 | 6 <sup>2</sup> 4 <sup>1</sup> 3 <sup>1</sup>                |
| 23  | 1850.19             | 6 <sup>0</sup> 2 <sup>1</sup>                | 2796.80 | 6 <sup>3</sup> 5 <sup>1</sup> 3 <sup>1</sup>                | 3297.63           | 6 <sup>1</sup> 3 <sup>1</sup> 2 <sup>1</sup>                | 2510.03 | 6 <sup>2</sup> 5 <sup>2</sup>                | 3487.93 | 6 <sup>0</sup> 3 <sup>1</sup> 2 <sup>1</sup>                |
| 24  | 1879.07             | 6 <sup>1</sup> 5 <sup>1</sup> 4 <sup>1</sup> | 2816.51 | 6 <sup>0</sup> 5 <sup>3</sup> 3 <sup>1</sup>                | 3310.26           | 6 <sup>2</sup> 5 <sup>1</sup> 4 <sup>1</sup> 3 <sup>1</sup> | 2554.54 | 6 <sup>2</sup> 3 <sup>1</sup>                |         |                                                             |
| 25  | 1966.92             | 6 <sup>0</sup> 4 <sup>1</sup> 3 <sup>1</sup> | 2828.60 | 6 <sup>1</sup> 5 <sup>1</sup> 2 <sup>1</sup>                | 3317.26           | 6 <sup>4</sup> 5 <sup>3</sup>                               | 2594.99 | 6 <sup>0</sup> 5 <sup>2</sup> 4 <sup>1</sup> |         |                                                             |
| 26  | 1969.98             | 6 <sup>2</sup> 5 <sup>2</sup>                | 2843.26 | 6 <sup>0</sup> 4 <sup>2</sup> 3 <sup>1</sup>                | 3321.97           | 6 <sup>1</sup> 5 <sup>1</sup> 4 <sup>1</sup> 2 <sup>1</sup> | 2610.56 | 6 <sup>5</sup>                               |         |                                                             |
| 27  | 2030.58             | 6 <sup>3</sup> 4 <sup>1</sup>                | 2858.43 | 6 <sup>2</sup> 5 <sup>2</sup> 4 <sup>1</sup>                | 3326.13           | 6 <sup>5</sup> 5 <sup>1</sup> 4 <sup>1</sup>                | 2628.05 | 6 <sup>0</sup> 4 <sup>1</sup> 3 <sup>1</sup> |         |                                                             |
| 28  | 2051.95             | 6 <sup>1</sup> 5 <sup>1</sup> 3 <sup>1</sup> | 2877.45 | 6 <sup>5</sup> 3 <sup>1</sup>                               | 3330.88           | 6 <sup>8</sup> 5 <sup>1</sup>                               | 2636.90 | 6 <sup>1</sup> 5 <sup>3</sup>                |         |                                                             |
| 29  | 2066.33             | 6 <sup>0</sup> 5 <sup>2</sup> 4 <sup>1</sup> | 2887.77 | 6 <sup>2</sup> 3 <sup>2</sup>                               | 3335.53           | 6 <sup>4</sup> 2 <sup>1</sup>                               | 2660.66 | 6 <sup>1</sup> 5 <sup>1</sup> 3 <sup>1</sup> |         |                                                             |
| 30  | 2099.72             | 6 <sup>4</sup> 5 <sup>1</sup>                | 2909.81 | 6 <sup>3</sup> 4 <sup>2</sup>                               | 3349.74           | 6 <sup>1</sup> 5 <sup>2</sup> 4 <sup>2</sup>                | 2735.95 | 6 <sup>0</sup> 5 <sup>4</sup>                |         |                                                             |
| 31  | 2138.31             | 6 <sup>0</sup> 3 <sup>2</sup>                | 2913.31 | 6 <sup>0</sup> 3 <sup>1</sup> 2 <sup>1</sup>                | 3356.79           | 6 <sup>1</sup> 5 <sup>5</sup>                               | 2767.73 | 6 <sup>0</sup> 5 <sup>2</sup> 3 <sup>1</sup> |         |                                                             |
| 32  | 2146.25             | 6 <sup>6</sup>                               | 2919.94 | 6 <sup>9</sup>                                              | 3390.67           | 6 <sup>3</sup> 5 <sup>2</sup> 3 <sup>1</sup>                | 2785.22 | 6 <sup>0</sup> 3 <sup>2</sup>                |         |                                                             |
| 33  | 2171.18             | 6 <sup>1</sup> 5 <sup>3</sup>                | 2933.43 | 6 <sup>1</sup> 5 <sup>1</sup> 4 <sup>1</sup> 3 <sup>1</sup> | 3394.20           | 6 <sup>1</sup> 4 <sup>1</sup> 3 <sup>2</sup>                | 2795.64 | 6 <sup>3</sup> 4 <sup>1</sup>                |         |                                                             |
| 34  | 2174.36             | 6 <sup>1</sup> 4 <sup>2</sup>                | 2933.70 | 6 <sup>0</sup> 5 <sup>5</sup>                               | 3394.77           | 6 <sup>0</sup> 5 <sup>4</sup> 3 <sup>1</sup>                | 2837.30 | 6 <sup>1</sup> 2 <sup>1</sup>                |         |                                                             |
| 35  | 2202.66             | 6 <sup>3</sup> 3 <sup>1</sup>                | 2948.57 | 6 <sup>0</sup> 5 <sup>2</sup> 4 <sup>2</sup>                | 3398.98           | 6 <sup>6</sup> 5 <sup>2</sup>                               | 2865.63 | 6 <sup>3</sup> 5 <sup>2</sup>                |         |                                                             |
| 36  | 2238.01             | 6 <sup>0</sup> 5 <sup>2</sup> 3 <sup>1</sup> | 2949.46 | 6 <sup>3</sup> 3 <sup>3</sup>                               | 3415.61           | 6 <sup>0</sup> 5 <sup>1</sup> 4 <sup>2</sup> 3 <sup>1</sup> | 2910.90 | 6 <sup>2</sup> 5 <sup>1</sup> 4 <sup>1</sup> |         |                                                             |
| 37  | 2240.93             | 6 <sup>1</sup> 2 <sup>1</sup>                | 2982.64 | 6 <sup>4</sup> 5 <sup>1</sup> 4 <sup>1</sup>                | 3416.28           | 6 <sup>1</sup> 5 <sup>2</sup> 2 <sup>1</sup>                | 2915.06 | 6 <sup>1</sup> 4 <sup>2</sup>                |         |                                                             |
| 38  | 2262.64             | 6 <sup>2</sup> 5 <sup>1</sup> 4 <sup>1</sup> | 2985.25 | 6 <sup>3</sup> 2 <sup>1</sup>                               | 3418.36           | 6 <sup>4</sup> 4 <sup>1</sup> 3 <sup>1</sup>                | 2916.09 | 6 <sup>0</sup> 5 <sup>1</sup> 2 <sup>1</sup> |         |                                                             |
| 39  | 2346.89             | 6 <sup>3</sup> 5 <sup>2</sup>                | 3013.27 | 6 <sup>0</sup> 5 <sup>2</sup> 2 <sup>1</sup>                | 3424.89           | 6 <sup>2</sup> 4 <sup>3</sup>                               | 2946.41 | 6 <sup>6</sup>                               |         |                                                             |
| 40  | 2347.23             | 6 <sup>0</sup> 5 <sup>4</sup>                | 3015.31 | 6 <sup>0</sup> 4 <sup>1</sup> 3 <sup>2</sup>                | 3447.33           | 6 <sup>2</sup> 1 <sup>1</sup>                               | 2954.62 | 6 <sup>3</sup> 3 <sup>1</sup>                |         |                                                             |
| 41  | 2351.61             | 6 <sup>1</sup> 4 <sup>1</sup> 3 <sup>1</sup> | 3018.82 | 6 <sup>6</sup> 4 <sup>1</sup>                               | 3454.11           | 6 <sup>2</sup> 5 <sup>3</sup> 4 <sup>1</sup>                | 2994.71 | 6 <sup>0</sup> 5 <sup>1</sup> 4 <sup>2</sup> |         |                                                             |
| 42  | 2367.41             | 6 <sup>0</sup> 5 <sup>1</sup> 4 <sup>2</sup> | 3021.60 | 6 <sup>2</sup> 5 <sup>2</sup> 3 <sup>1</sup>                | 3454.54           | 6 <sup>7</sup> 3 <sup>1</sup>                               | 3034.48 | 6 <sup>1</sup> 5 <sup>2</sup> 4 <sup>1</sup> |         |                                                             |
| 43  | 2378.68             | 6 <sup>4</sup> 4 <sup>1</sup>                | 3037.42 | 6 <sup>5</sup> 5 <sup>2</sup>                               | 3469.08           | 6 <sup>2</sup> 5 <sup>1</sup> 3 <sup>2</sup>                | 3041.92 | 6 <sup>2</sup> 5 <sup>3</sup>                |         |                                                             |
| 44  | 2423.79             | 6 <sup>7</sup>                               | 3050.64 | 6 <sup>1</sup> 4 <sup>3</sup>                               | 3486.56           | 6 <sup>5</sup> 5 <sup>1</sup> 3 <sup>1</sup>                | 3057.34 | 6 <sup>7</sup>                               |         |                                                             |
| 45  | 2430.57             | 6 <sup>2</sup> 5 <sup>1</sup> 3 <sup>1</sup> | 3059.60 | 6 <sup>1</sup> 5 <sup>3</sup> 4 <sup>1</sup>                | 3486.66           | 6 <sup>0</sup> 5 <sup>1</sup> 4 <sup>2</sup> 3 <sup>1</sup> | 3073.12 | 6 <sup>1</sup> 4 <sup>1</sup> 3 <sup>1</sup> |         |                                                             |



Table S5. Pure torsional states of *trans*-HOCO, *cis*-HOCO, *trans*-DOCO and *cis*-DOCO

| level    | <i>trans</i> -HOCO | <i>cis</i> -HOCO | <i>trans</i> -DOCO | <i>cis</i> -DOCO |
|----------|--------------------|------------------|--------------------|------------------|
| $6^0$    | 0                  | 527.24           | 0                  | 564.42           |
| $6^1$    | 502.78             | 1074.84          | 392.77             | 1020.97          |
| $6^2$    | 982.22             | 1582.87          | 773.69             | 1451.47          |
| $6^3$    | 1436.80            | 2042.61          | 1141.24            | 1861.36          |
| $6^4$    | 1861.93            | 2459.03          | 1493.73            | 2248.34          |
| $6^5$    | 2251.07            | 2790.96          | 1829.21            | 2610.56          |
| $6^6$    | 2595.0             | 2966.79          | 2146.25            | 2946.41          |
| $6^7$    | 2790.96            |                  | 2423.79            | 3057.34          |
| $6^8$    | 2966.79            |                  | 2686.60            |                  |
| $6^9$    |                    |                  | 2919.94            |                  |
| $6^{10}$ |                    |                  | 3090.31            |                  |
|          |                    |                  |                    |                  |

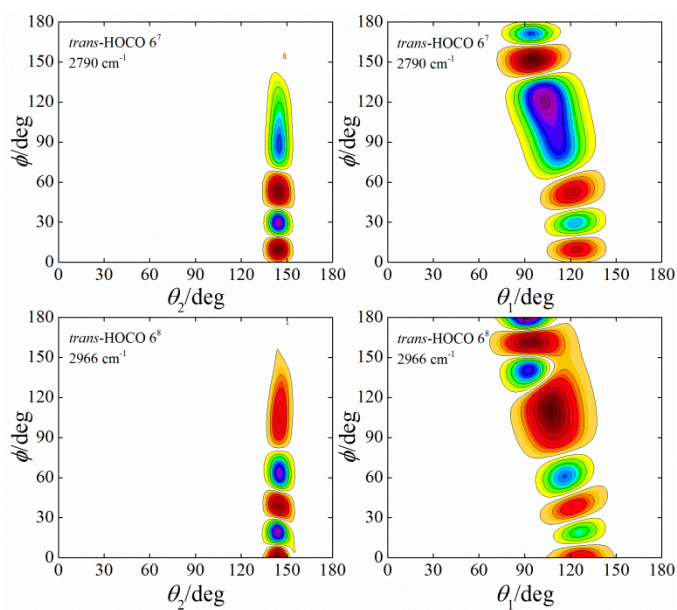

Figure S2. Wavefunctions of the *trans*- $6^7/6^8$  states shown in the  $(\theta_2, \phi)$  and  $(\theta_1, \phi)$  planes; the remaining four coordinates take the equilibrium values of *trans*-HOCO.

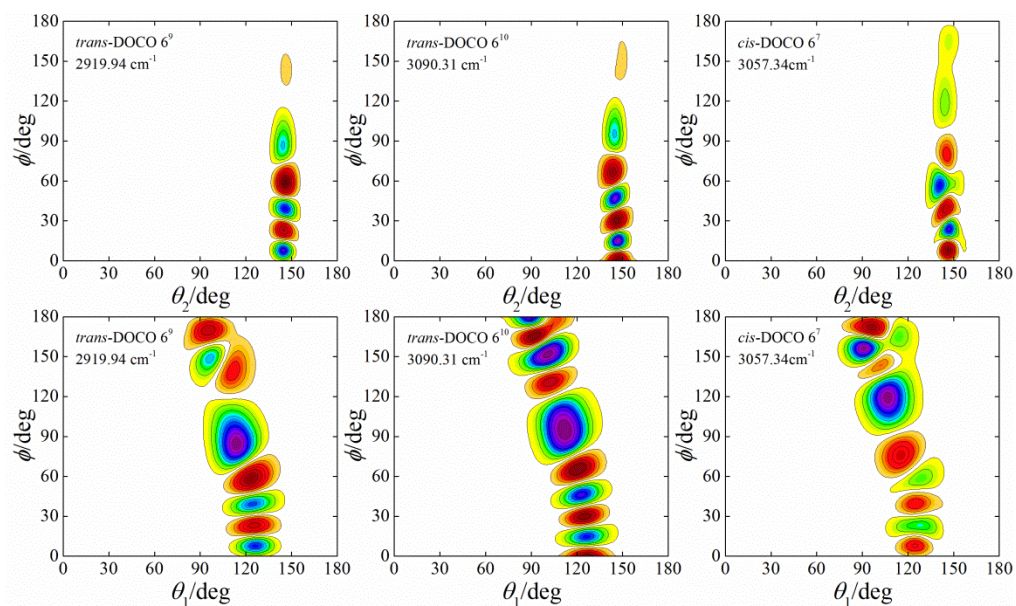

Figure S3. Wavefunctions of the  $trans\text{-}6^9/6^{10}$  and  $cis\text{-}6^7$  states shown in the  $(\theta_2, \phi)$  and  $(\theta_1, \phi)$  planes; the remaining four coordinates take the equilibrium values of  $trans\text{-DOCO}$ .

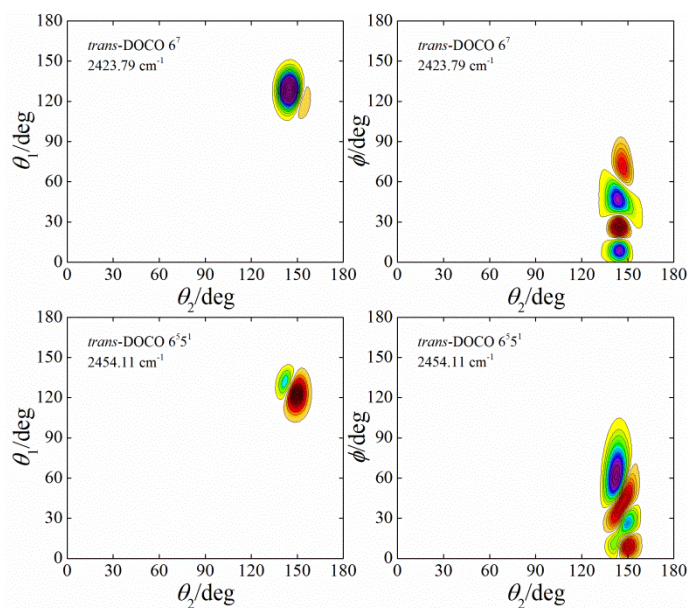

Figure S4. Wavefunctions of the  $trans\text{-}6^7$  and  $trans\text{-}6^5 6^1$  states shown in the  $(\theta_2, \theta_1)$  and  $(\theta_2, \phi)$  planes; the remaining four coordinates take the equilibrium values of  $trans\text{-DOCO}$ .

## References

1. J. Li, J. Chen, D. H. Zhang and H. Guo, *J. Chem. Phys.*, 2014, **140**, 044327.
2. J. Chen, X. Xu, X. Xu and D. H. Zhang, *J Chem Phys*, 2013, **138**, 221104.
3. Z. Xie and J. M. Bowman, *J. Chem. Theor. Comput.*, 2010, **6**, 26.
4. J. Li, B. Jiang and H. Guo, *J Chem Phys*, 2013, **139**, 204103.
5. M. T. Hagan and M. B. Menhaj, *IEEE Trans. Neural Networks* 1994, **5**, 989.
6. Z.-H. Zhou, J. Wu and W. Tang, *Art. Intel.*, 2002, **137**, 239.
7. H. Guo, *Rev. Comput. Chem.*, 2007, **25**, 285-347.
8. J. Echave and D. C. Clary, *Chem. Phys. Lett.*, 1992, **190**, 225.
9. H. Wei and T. Carrington Jr., *J. Chem. Phys.*, 1992, **97**, 3029.
10. R. Chen, G. Ma and H. Guo, *J. Chem. Phys.*, 2001, **114**, 4763-4774.
11. M. Mladenović, *J. Phys. Chem. A*, 2013, **117**, 7224-7235.
12. X. Huang, R. C. Fortenberry, Y. Wang, J. S. Francisco, T. D. Crawford, J. M. Bowman and T. J. Lee, *J. Phys. Chem. A*, 2013, **117**, 6932-6939.
13. D. E. Milligan and M. E. Jacox, *J. Chem. Phys.*, 1971, **54**, 927-942.
14. D. Forney, M. E. Jacox and W. E. Thompson, *J. Chem. Phys.*, 2003, **119**, 10814-10823.
15. T. J. Sears, W. M. Fawzy and P. M. Johnson, *J. Chem. Phys.*, 1992, **97**, 3996-4007.
16. T. Oyama, W. Funato, Y. Sumiyoshi and Y. Endo, *J. Chem. Phys.*, 2011, **134**, 174303.
17. J. T. Petty and C. B. Moore, *J. Chem. Phys.*, 1993, **99**, 47.
